# Supplementary material for: Low sensitivity of gross primary production to elevated CO 2 in a mature eucalypt woodland
Source: Copernicus journal article supplement (doi:10.5194/bg-17-265-2020), 2020-01-20
Supplement: Supplementary file 1 [file bg-17-265-2020-supplement.pdf]

Supplement of Biogeosciences, 17, 265–279, 2020  
<https://doi.org/10.5194/bg-17-265-2020-supplement>  
© Author(s) 2020. This work is distributed under  
the Creative Commons Attribution 4.0 License.

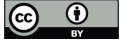

*Supplement of*

## **Low sensitivity of gross primary production to elevated CO<sub>2</sub> in a mature eucalypt woodland**

**Jinyan Yang et al.**

*Correspondence to:* Jinyan Yang ([jinyan.yang@westernsydney.edu.au](mailto:jinyan.yang@westernsydney.edu.au))

The copyright of individual parts of the supplement might differ from the CC BY 4.0 License.

## Supplementary

### TEXT S1. Additional equations of photosynthesis and respiration

$A_{net}$  was modelled as:

$$A_{net} = \min(A_c, A_j) - R_{day} \quad (S1)$$

where  $A_c$  is the gross photosynthetic rate limited by carboxylation rate, while  $A_j$  is the photosynthetic rate limited by electron transport rate;  $R_{day}$  is the light respiration rate in absence of photorespiration ( $\mu\text{mol m}^{-2} \text{s}^{-1}$ ).

$A_c$  is calculated as a function of maximum carboxylation capacity ( $V_{cmax}$ ;  $\mu\text{mol m}^{-2} \text{s}^{-1}$ ) and intercellular  $\text{CO}_2$  concentration ( $C_i$ ):

$$A_c = V_{cmax} \frac{C_i - \Gamma^*}{K_c(1 + \frac{O_i}{K_o}) + C_i} \quad (S2)$$

where  $K_c$  and  $K_o$  are the Michaelis–Menten coefficients of Rubisco activity for  $\text{CO}_2$  and  $\text{O}_2$ , respectively ( $\mu\text{mol mol}^{-1}$  and  $\text{mmol mol}^{-1}$ , respectively), and  $\Gamma^*$  is the  $\text{CO}_2$  compensation point in the absence of mitochondrial respiration ( $\mu\text{mol mol}^{-1}$ );  $O_i$  is intercellular  $\text{O}_2$  concentration ( $\text{mmol mol}^{-1}$ ). The  $K_c$ ,  $K_o$ , and  $\Gamma^*$  are temperature dependent following Bernacchi et al. (2001).

$A_j$  is calculated according to:

$$A_j = \frac{J}{4} \frac{C_i - \Gamma^*}{C_i + 2\Gamma^*} \quad (S3)$$

where  $J$  is the electron transport rate calculated by solving:

$$\theta_j \cdot J^2 - (a_{abs} \cdot \alpha_j \cdot Q_L + J_{max}) \cdot J + a_{abs} \cdot \alpha_j \cdot Q_L \cdot J_{max} = 0 \quad (S4)$$

where  $\theta_j$  describes the curvature electron transport rate (unitless);  $\alpha_j$  is the quantum yield ( $\mu\text{mol } \mu\text{mol}^{-1}$ );  $Q_L$  is the PAR incident on the leaf;  $a_{abs}$  is the absorptance of PAR (1 minus leaf reflectance and transmittance; fraction);  $J_{max}$  is the maximum electron transport rate at the given temperature ( $\mu\text{mol m}^{-2} \text{s}^{-1}$ ). Both  $J_{max}$  and  $V_{cmax}$  depend on leaf temperature and are modelled using a peaked Arrhenius function:

$$k_T = k_{25} \cdot \exp\left(\frac{E_a - 298.15}{298.15 \cdot R_{gas} \cdot T_k}\right) \cdot \left(1 + \frac{\exp(298.15 \cdot \Delta S - H_d)}{298.15 \cdot R_{gas}}\right) / \left(1 + \frac{\exp(T_k \cdot \Delta S - H_d)}{T_k \cdot R_{gas}}\right) \quad (S5)$$

where  $k_t$  is the value of  $J_{max}$  or  $V_{cmax}$  at a given temperature ( $\mu\text{mol m}^{-2} \text{s}^{-1}$ );  $k_{25}$  is the value of  $J_{max}$  or  $V_{cmax}$  at 25 °C;  $\mu\text{mol m}^{-2} \text{s}^{-1}$ );  $T_k$  is the leaf temperature in Kelvin;  $E_a$  is the activation energy which describes the rate of increase of  $k_t$  to temperature ( $\text{J mol}^{-1}$ );  $H_d$  is the deactivation energy which describe the rate of decrease of  $k_t$  to temperature ( $\text{J mol}^{-1}$ );  $\Delta S$  is known as the entropy factor ( $\text{J mol}^{-1} \text{K}^{-1}$ );  $R_{gas}$  is the gas constant ( $\text{J mol}^{-1} \text{K}^{-1}$ ).

The model also assumes  $R_{day}$  to be a fixed fraction (0.7) of  $R_{dark}$  (dark respiration rate;  $\mu\text{mol m}^{-2} \text{s}^{-1}$ ), and uses an Arrhenius temperature response function:

$$R_{dark} = R_{dark,25} \cdot \exp(k_T \cdot (T_{leaf} - 25)) \quad (S6)$$

where  $k_T$  is the sensitivity of  $R_{dark}$  to temperature ( $^{\circ}\text{C}^{-1}$ ); and  $T_{leaf}$  is the leaf temperature ( $^{\circ}\text{C}$ ). MAESPA calculates the leaf temperature that closes the energy balance iteratively (Medlyn et al., 2007).

The light response parameters  $\alpha_J$  and  $\theta_J$  of  $J$  were fitted to light response curves measured *in situ*. We assumed that  $\alpha_J$  is related to quantum yield of photosynthesis ( $\alpha_A$ ):

$$\alpha_J = 4 \cdot \alpha \cdot \frac{C_i + 2 \cdot \Gamma^*}{C_i - \Gamma^*} \quad (S7)$$

A linear model was fitted to the measured photosynthesis fluxes and absorbed PAR from the initial part of the light response curves ( $< 100 \mu\text{mol m}^{-2} \text{s}^{-1}$ ) and the fitted slope was assumed to be  $\alpha_A$ . This slope was converted to  $\alpha_J$  using Eqn. S7. The curvature of  $J$  ( $\theta_J$ ) was here assumed to be the same as that for photosynthesis and thus was estimated by fitting the following quadratic relationship:

$$A_{net} = \frac{\alpha_{abs} \cdot \alpha_A \cdot Q_L + A_{max} - \sqrt{(\alpha_{abs} \cdot \alpha_A \cdot Q_L + A_{max})^2 - 4 \cdot \alpha_{abs} \cdot \alpha_A \cdot Q_L \cdot A_{max} \cdot \theta_J}}{2 \cdot \theta_J} + R_{day} \quad (S8)$$

where  $A_{max}$  is the maximum of  $A$ ,  $Q_L$  is the incident PAR and  $\alpha_{abs}$  is the absorptance, which was calculated to be 0.825, by subtracting the fractions of reflectance (0.082) and transmittance (0.093). Eqn. S8 was fitted to the full light response curves using non-linear least squared method to obtain the values of  $A_{max}$  and  $\theta_J$ , assuming  $\alpha_A$  from above. Since the fitting was not significantly different in the ambient and elevated data, this study used one  $\theta_J$  value fitted to all the data. The assumptions of the quantum yield and convexity being the same between  $J$  and overall photosynthesis are further explored by comparing the photosynthesis predicted by the fitted  $\alpha_A$ ,  $A_{max}$ , and  $\theta_J$  to the measured light response curve. There's good agreement with a root mean square error of  $2.97 \mu\text{mol m}^{-2} \text{s}^{-1}$  and a coefficient of correlation of 0.9, suggesting the assumptions are appropriate in our site.

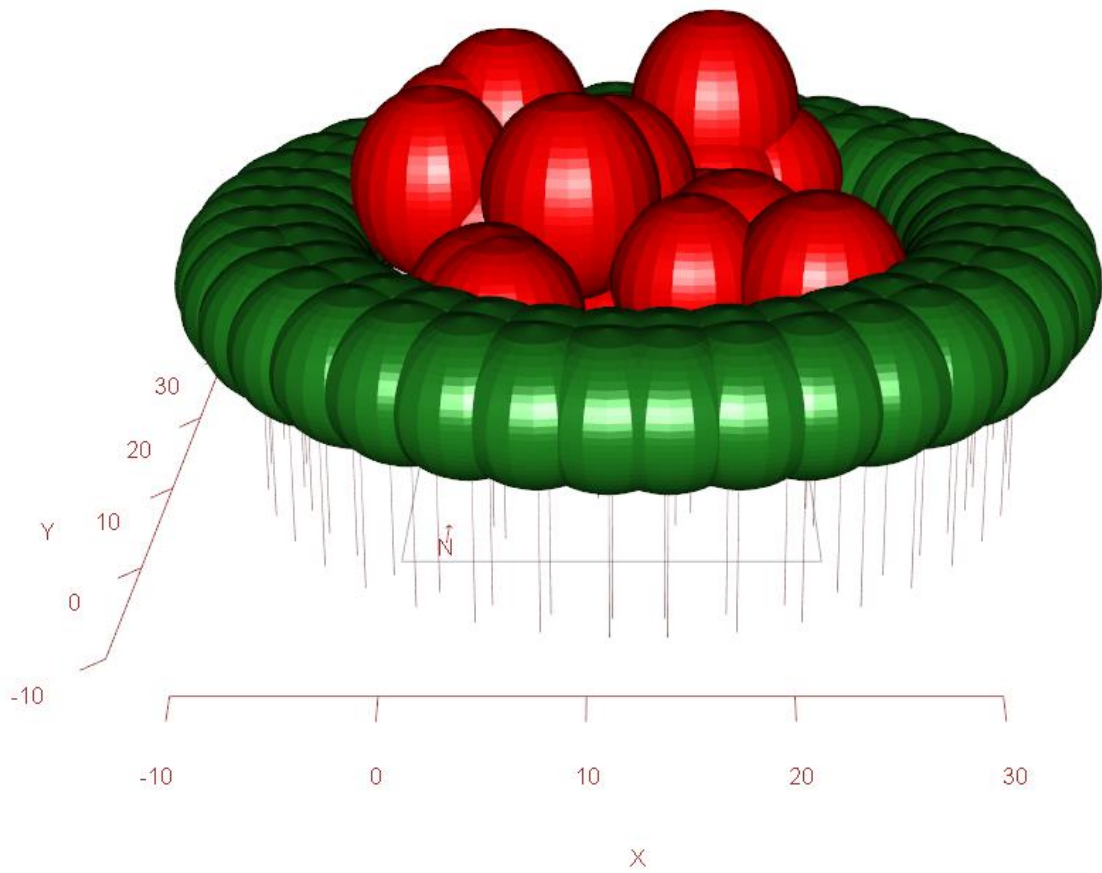

*Figure S1. Example of tree stand as represented in MAESPA. The figure shows the trees in ring 1 (red) and the surrounding trees outside the ring (green). Other rings look similar with realistic tree locations and sizes.*

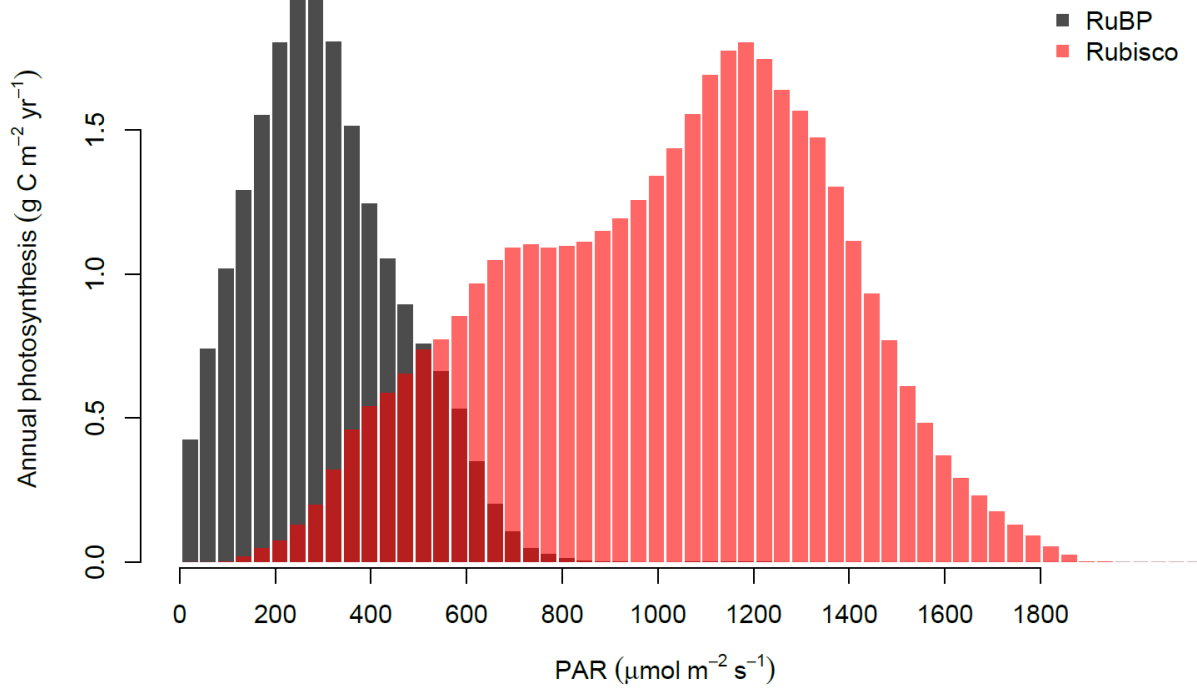

Figure S2. Distribution of average annual photosynthesis limited by Rubisco activity and RuBP-regeneration in bins of PAR ( $30 \mu\text{mol m}^{-2} \text{s}^{-1}$ ), as calculated by MAESPA for all rings during 2013. This figure is produced with a  $\theta_J$  of 0.85 and a J:V ratio of 2, which represents common model assumptions for these values.
